# Supplementary material for: Green tea and green tea extract in oncological treatment: A systematic review
Source: Atypon-hosted journal article supplement (doi:10.1024/0300-9831/a000698), 2021-02-17
Supplement: 0300-9831_a000698_esm1.pdf [file 0300-9831_a000698_esm1.pdf]

Title: Green tea and green tea extract in oncological treatment: a systematic review

Journal: International Journal for Vitamin and Nutrition Research

Authors: Fanny Wiese, Sabine Kutschan, Jennifer Doerfler, Viktoria Mathies, Jens Buentzel, Judith Buentzel, Jutta Huebner

Corresponding author: Fanny Wiese, Klinik für Innere Medizin II, Hämatologie und Internistische Onkologie, Universitätsklinikum Jena, Am Klinikum 1, 07747 Jena, Germany, [fanny.wiese@med.uni-jena.de](mailto:fanny.wiese@med.uni-jena.de)

Electronic Supplementary Material 1, <https://doi.org/10.1024/0300-9831/a000698>

### Electronic supplementary material 1. Search strategies for each database

| Database        | Search strategy (25.06.2018-17.07.2018)                                                                                                                                                                                                                                                                                                                                                                                                                                                                                                                                                                                                                                                                                                                                                                                                                                                                                                                                                                                                                                                                                                                                                                                                                                                                                                                                                                                                                                                                                                                                               |
|-----------------|---------------------------------------------------------------------------------------------------------------------------------------------------------------------------------------------------------------------------------------------------------------------------------------------------------------------------------------------------------------------------------------------------------------------------------------------------------------------------------------------------------------------------------------------------------------------------------------------------------------------------------------------------------------------------------------------------------------------------------------------------------------------------------------------------------------------------------------------------------------------------------------------------------------------------------------------------------------------------------------------------------------------------------------------------------------------------------------------------------------------------------------------------------------------------------------------------------------------------------------------------------------------------------------------------------------------------------------------------------------------------------------------------------------------------------------------------------------------------------------------------------------------------------------------------------------------------------------|
| Ovid<br>Medline | 1 exp tea/or exp Camellia sinensis/ or Epigallocatechin\$.mp. or EGCG.mp.or (green adj3 tea\$.mp. or Camellia sinensis.mp. or Catechin\$.mp<br>2 exp neoplasms/ or neoplasm\$.mp or cancer\$.mp. or tumor\$.mp. or malignan\$.mp. or oncolog\$.mp. or carcinom\$.mp. or leuk?emia.mp. or lymphom\$.mp. or sarcom\$.mp.<br>3 1 AND 2<br>4 limit 3 to english or limit 3 to german<br>5 limit 4 to yr="1995 -Current"<br>6 (5 and humans/) or (5 not animals/)<br>7 (((comprehensive* or integrative or systematic*) adj3 (bibliographic* or review* or literature)) or (meta-analy* or metaanaly* or "research synthesis" or ((information or data) adj3 synthesis) or (data adj2 extract*))).ti,ab. or (cinahl or (cochrane adj3 trial*) or embase or medline or psyclit or (psycinfo not "psycinfo database") or pubmed or scopus or "sociological abstracts" or "web of science").ab. or ("cochrane database of systematic reviews" or evidence report technology assessment or evidence report technology assessment summary).jn. or Evidence Report: Technology Assessment*.jn. or ((review adj5 (rationale or evidence)).ti,ab. and review.pt.) or meta-analysis as topic/ or Meta-Analysis.pt.<br>8 randomized controlled trial.pt. or controlled clinical trial.pt. or randomized.ti,ab. or placebo.ti,ab. or drug therapy.sh. or randomly.ti,ab. or trial.ti,ab. or groups.ti,ab.<br>9 6 AND (7 OR 8)                                                                                                                                                                         |
| Ovid<br>Embase  | 1 exp tea/ or exp Camellia sinensis/ or exp epigallocatechin gallate or Epigallocatechin\$.mp. or EGCG.mp.or (green adj3 tea\$.mp. or Camellia sinensis.mp. or Catechin\$.mp<br>2 exp neoplasms/ or neoplasm\$.mp or cancer\$.mp. or tumor\$.mp. or malignan\$.mp. or oncolog\$.mp. or carcinom\$.mp. or leuk?emia.mp. or lymphom\$.mp. or sarcom\$.mp.<br>3 1 AND 2<br>4 limit 3 to english or limit 3 to german<br>5 limit 4 to yr="1995 -Current"<br>6 (5 and humans/) or (5 not animals/)<br>7 (((comprehensive* or integrative or systematic*) adj3 (bibliographic* or review* or literature)) or (meta-analy* or metaanaly* or "research synthesis" or ((information or data) adj3 synthesis) or (data adj2 extract*))).ti,ab. or (cinahl or (cochrane adj3 trial*) or embase or medline or psyclit or (psycinfo not "psycinfo database") or pubmed or scopus or "sociological abstracts" or "web of science" or central).ab. or ("cochrane database of systematic reviews" or evidence report technology assessment or evidence report technology assessment summary).jn. or Evidence Report: Technology Assessment*.jn. or (network adj1 analy*).ti,ab.) or (exp Meta Analysis/ or ((data extraction.ab. or selection criteria.ab.) and review.pt.))<br>8 crossover procedure/ or double blind procedure/ or randomized controlled trial/ or single blind procedure/ or (random\$ or factorial\$ or crossover\$ or (cross adj1 over\$) or placebo\$ or (doubl\$ adj1 blind\$) or (singl\$ adj1 blind\$) or assign\$ or allocat\$ or volunteer\$.ti,ab,de.<br>9 6 AND (7 OR 8) |
| Cochrane        | #1 [mh tea] or [mh "Camellia sinensis"] or Epigallocatechin* or EGCG or green next/3 tea*or "Camellia sinensis" or Catechin*<br>#2 [mh neoplasms] or neoplasm* or cancer? or tum*r? or malignan* or oncolog* or carcinom* or leuk*mia or lymphoma? or sarcoma?<br>#3 1 AND 2                                                                                                                                                                                                                                                                                                                                                                                                                                                                                                                                                                                                                                                                                                                                                                                                                                                                                                                                                                                                                                                                                                                                                                                                                                                                                                          |

Title: Green tea and green tea extract in oncological treatment: a systematic review

Journal: International Journal for Vitamin and Nutrition Research

Authors: Fanny Wiese, Sabine Kutschan, Jennifer Doerfler, Viktoria Mathies, Jens Buentzel, Judith Buentzel, Jutta Huebner

Corresponding author: Fanny Wiese, Klinik für Innere Medizin II, Hämatologie und Internistische Onkologie, Universitätsklinikum Jena, Am Klinikum 1, 07747 Jena, Germany, [fanny.wiese@med.uni-jena.de](mailto:fanny.wiese@med.uni-jena.de)

Ebsco -  
PsychINFO S1 TX Epigallocatechin\* OR TX EGCG OR TX green N3 tea\* OR TX "Camellia sinensis"  
OR TX Catechin\*  
S2 ((DE "Neoplasms" OR DE "Benign Neoplasms" OR DE "Breast Neoplasms" OR DE  
"Endocrine Neoplasms" OR DE "Leukemias" OR DE "Melanoma" OR DE "Metastasis" OR  
DE "Nervous System Neoplasms" OR DE "Terminal Cancer") OR (TX neoplasm\* OR TX  
cancer OR TX tumor OR TX malignan\* OR DE „oncology“ OR TX oncolog\* OR TX  
carcinom\* OR TX leuk#emia OR TX lymphoma OR TX sarcoma))  
S3 (LA German OR LA English)  
S4 S1 AND S2 AND S3  
S5 ((comprehensive\* OR integrative OR systematic\*) N3 (bibliographic\* OR review\* OR  
literature)) OR (meta-analy\* or metaanaly\* or "research synthesis" OR ((information OR data  
N3 synthesis) OR (data N2 extract\*)) OR ((review N5 (rationale OR evidence)) AND DE  
"Literature Review") OR (AB(cinahl OR (cochrane N3 trial\*) OR embase OR medline OR  
psyclit OR pubmed OR scopus OR "sociological abstracts" OR "web of science" OR central))  
OR DE "Meta Analysis" OR (network N1 analy\*))  
S6 DE "Treatment Effectiveness Evaluation" OR DE "Treatment Outcomes" OR DE  
"Psychotherapeutic Outcomes" OR DE "Placebo" or DE "Followup Studies" OR placebo\*  
OR random\* OR "comparative stud\*" OR (clinical N3 trial\*) OR (research N3 design) OR  
(evaluat\* N3 stud\*) OR (prospectiv\* N3 stud\*) OR ((singl\* OR doubl\* OR trebl\* OR tripl\*)  
N3 (blind\* OR mask\*))  
S7 S4 AND (S5 OR S6)

Ebsco-  
CINAHL S1 (MH "Tea+") OR TX Epigallocatechin\* OR TX EGCG OR TX green N3 tea\* OR TX  
"Camellia sinensis" OR TX Catechin\*  
S2 (MH "Neoplasms+" OR TX neoplasm\* OR TX cancer OR TX tumor OR TX malignan\*  
OR TX oncolog\* OR TX carcinom\* OR TX leuk#emia OR TX lymphoma OR TX sarcoma  
OR MH "Precancerous Conditions+" OR TX precancer\* OR TX preneoplas\*)  
S3 (LA German OR LA English)  
S4 S1 AND S2 AND S3  
S5 (TI (systematic\* n3 review\*)) or (AB (systematic\* n3 review\*)) or (TI (systematic\* n3  
bibliographic\*)) or (AB (systematic\* n3 bibliographic\*)) or (TI (systematic\* n3 literature)) or  
(AB (systematic\* n3 literature)) or (TI (comprehensive\* n3 literature)) or (AB  
(comprehensive\* n3 literature)) or (TI (comprehensive\* n3 bibliographic\*)) or (AB  
(comprehensive\* n3 bibliographic\*)) or (TI (integrative n3 review)) or (AB (integrative n3  
review)) or (JN "Cochrane Database of Systematic Reviews") or (TI (information n2  
synthesis)) or (TI (data n2 synthesis)) or (AB (information n2 synthesis)) or (AB (data n2  
synthesis)) or (TI (data n2 extract\*)) or (AB (data n2 extract\*)) or (TI (medline or pubmed or  
psyclit or cinahl or (psycinfo not "psycinfo database") or "web of science" or scopus or  
embase)) or (AB (medline or pubmed or psyclit or cinahl or (psycinfo not "psycinfo  
database") or "web of science" or scopus or embase or central)) or (MH "Systematic Review")  
or (MH "Meta Analysis") or (TI (meta-analy\* or metaanaly\*)) or (AB (meta-analy\* or  
metaanaly\*)) or network n1 analy\*  
S6 (MH "Clinical Trials+") or PT Clinical trial or TX clinic\* n1 trial\* or TX ( (singl\* n1  
blind\*) or (singl\* n1 mask\*)) or TX ((doubl\* n1 blind\*) or (doubl\* n1 mask\*)) or TX ( (tripl\*  
n1 blind\*) or (tripl\* n1 mask\*)) or TX ((trebl\* n1 blind\*) or (trebl\* n1 mask\*)) or TX  
randomi\* control\* trial\* or (MH "Random Assignment") or TX random\* allocat\* or TX  
placebo\* or MH "Placebos") or MH "Quantitative Studies") or TX allocat\* random\*  
S7 S4 AND (S5 OR S6)

---
