# Supplementary material for: Green tea and green tea extract in oncological treatment: A systematic review
Source: Atypon-hosted journal article supplement (doi:10.1024/0300-9831/a000698), 2021-02-17
Supplement: 0300-9831_a000698_esm2.pdf [file 0300-9831_a000698_esm2.pdf]

Title: Green tea and green tea extract in oncological treatment: a systematic review

Journal: International Journal for Vitamin and Nutrition Research

Authors: Fanny Wiese, Sabine Kutschan, Jennifer Doerfler, Viktoria Mathies, Jens Buentzel, Judith Buentzel, Jutta Huebner

Corresponding author: Fanny Wiese, Klinik für Innere Medizin II, Hämatologie und Internistische Onkologie, Universitätsklinikum Jena, Am Klinikum 1, 07747 Jena, Germany, [fanny.wiese@med.uni-jena.de](mailto:fanny.wiese@med.uni-jena.de)

Electronic Supplementary Material 2, <https://doi.org/10.1024/0300-9831/a000698>

**Electronic supplementary material 2.** Evidence tables

| Reference                                                                                                                                                                                                                 | Study type                                                                                                                                                                                                         | Patient characteristics                                                                                                                                                                           | Intervention/ Control, observation                                                                                                                                                                                                                                             | Examined endpoints                                                                                                                                                                                                         | Key findings                                                                                                                                                                                                                                                                                                                    | Adverse Events/Interactions                                                                                                                                                                                                                                                                                                                                                                                                                            | Founding/ Conflicts of interest                                                                                                                                                    | Methodological comments                                                                                                                                                                                                                                                                                                                     | Evidence class (Oxford) |
|---------------------------------------------------------------------------------------------------------------------------------------------------------------------------------------------------------------------------|--------------------------------------------------------------------------------------------------------------------------------------------------------------------------------------------------------------------|---------------------------------------------------------------------------------------------------------------------------------------------------------------------------------------------------|--------------------------------------------------------------------------------------------------------------------------------------------------------------------------------------------------------------------------------------------------------------------------------|----------------------------------------------------------------------------------------------------------------------------------------------------------------------------------------------------------------------------|---------------------------------------------------------------------------------------------------------------------------------------------------------------------------------------------------------------------------------------------------------------------------------------------------------------------------------|--------------------------------------------------------------------------------------------------------------------------------------------------------------------------------------------------------------------------------------------------------------------------------------------------------------------------------------------------------------------------------------------------------------------------------------------------------|------------------------------------------------------------------------------------------------------------------------------------------------------------------------------------|---------------------------------------------------------------------------------------------------------------------------------------------------------------------------------------------------------------------------------------------------------------------------------------------------------------------------------------------|-------------------------|
| <b>Crew (2012): Phase IB Randomized, Double-Blinded, Placebo-Controlled, Dose Escalation Study of Polyphenon E in Women with Hormone Receptor-Negative Breast Cancer. Cancer Prevention Research (Philadelphia, Pa.).</b> | multicentric<br>double-blinded<br>randomized<br>4 arms<br>number of participants included: N=40<br>(evaluated: N=40, intent-to-treat; drop-out: N=6)<br>USA<br>(Houston and New York),<br>July 2007 to August 2009 | breast cancer (estrogen and progesterone receptor negative, stage I-III (not metastasized), last CTx, RTx or surgery at least 6 months ago<br>gender: 100 % female<br>age: median=52, range=36-64 | <b>Arm A:</b><br>N=16, polyphenon E capsule, including 400mg EGCG, 2 x daily, for 6 months<br><b>Arm B:</b><br>N=11, polyphenon E capsule, including 600mg EGCG, 2 x daily, for 6 months<br><b>Arm C:</b><br>N=3, polyphenon E capsule, including 800mg EGCG, 2 x daily, for 6 | T0: baseline, T1: after 6 months<br><b>Primary endpoints:</b><br>1. maximum tolerated dose (toxicity level of 25% of participants with toxicity ≥ grade II according to CTCAE)<br>Preclinical outcomes were also assessed. | 1. dose-limiting toxicities:<br>arm A: 6.25% (grade III rectal bleeding - day 18),<br>arm B: 27% (grade II weight gain - day 138, grade III indigestion - day 40, grade III insomnia - day 6),<br>arm C: 33% (grade III transaminase elevation (ALT) - day 91)<br><br>The rectal bleeding occurred in a woman with pre-existing | registration: using the CTCAE<br>no significant differences between groups A+B+C and D<br>number of side effects (number of affected patients in %):<br><b>Arm A+B+C:</b><br>nausea: 8 (27)<br>diarrhea: 3 (10)<br>constipation: 3 (10)<br>indigestion: 10 (33)<br>abdominal pain: 1 (3)<br>flatulence: 1 (3)<br>gastrointestinal bleed: 1 (3)<br>weight gain: 1 (3)<br>palpitations: 1 (3)<br>dyspnea: 0 (0)<br>cough: 0 (0)<br>transaminitis: 3 (10) | P. Brown (co-author) is a Consultant/Advisory Board member of Susan G. Komen for the Cure (breast cancer organization USA)<br>no potential CoI were disclosed by the other authors | <b>PRO:</b><br>multicenter Study<br>ethics vote<br>wash-out and control of confounding factors: no tea and limited caffeine consumption prior to study initiation until end of the study<br><br>use of TITE-CRM (time-to-event continual reassessment method) and thus also recording of long-term (6 months) effects<br><br><b>CONTRA:</b> | 2b                      |

Title: Green tea and green tea extract in oncological treatment: a systematic review

Journal: International Journal for Vitamin and Nutrition Research

Authors: Fanny Wiese, Sabine Kutschan, Jennifer Doerfler, Viktoria Mathies, Jens Buentzel, Judith Buentzel, Jutta Huebner

Corresponding author: Fanny Wiese, Klinik für Innere Medizin II, Hämatologie und Internistische Onkologie, Universitätsklinikum Jena, Am Klinikum 1, 07747 Jena, Germany, [fanny.wiese@med.uni-jena.de](mailto:fanny.wiese@med.uni-jena.de)

| Reference | Study type | Patient characteristics | Intervention/<br>Control,<br>observation                                           | Examined endpoints | Key findings                                                                                                                                | Adverse Events/Interactions                                                                                                                                                                                                                                                                                                                                                                                                                                                                                                                          | Founding/<br>Conflicts of interest | Methodological comments                                                                                                                                                                                                                                                                                                                                                                   | Evidence class (Oxford) |
|-----------|------------|-------------------------|------------------------------------------------------------------------------------|--------------------|---------------------------------------------------------------------------------------------------------------------------------------------|------------------------------------------------------------------------------------------------------------------------------------------------------------------------------------------------------------------------------------------------------------------------------------------------------------------------------------------------------------------------------------------------------------------------------------------------------------------------------------------------------------------------------------------------------|------------------------------------|-------------------------------------------------------------------------------------------------------------------------------------------------------------------------------------------------------------------------------------------------------------------------------------------------------------------------------------------------------------------------------------------|-------------------------|
|           |            |                         | months<br><br><b>Arm D:</b><br>N=10,<br>Placebo, no information, except "matching" |                    | diverticulosis with hospitalization. There upon change of protocol with exclusion of women with gastrointestinal bleeding in their history. | hyperbilirubinemia: 0 (0)<br>high alkaline phosphatase: 2 (7)<br>high lipase: 2 (7)<br>hyperuricemia: 1 (3)<br>proteinuria: 3 (10)<br>anemia: 2 (7)<br>headache: 2 (7)<br>confusion: 0 (0)<br>insomnia: 4 (13)<br>irregular menses 1 (3)<br>hot flashes: 1 (3)<br>flushing: 0 (0)<br>vaginal symptoms: 0 (0)<br><br><b>Arm D:</b><br>nausea: 2 (20)<br>diarrhea: 2 (20)<br>constipation: 0 (0)<br>indigestion: 2 (20)<br>abdominal pain: 2 (20)<br>flatulence: 1 (10)<br>gastrointestinal bleed: 0 (0)<br>weight gain: 0 (0)<br>palpitations: 1 (10) |                                    | measurement of hormonal side effects such as irregular menses rather difficult, since postmenopausal women included in the study<br><br>intent-to-treat analysis for AE leads to the fact that AE can be underestimated<br><br>statistical comparison of AE not separated by dose and grade<br><br>no statistical comparison of group comparability to the baseline regarding demographic |                         |

Title: Green tea and green tea extract in oncological treatment: a systematic review

Journal: International Journal for Vitamin and Nutrition Research

Authors: Fanny Wiese, Sabine Kutschan, Jennifer Doerfler, Viktoria Mathies, Jens Buentzel, Judith Buentzel, Jutta Huebner

Corresponding author: Fanny Wiese, Klinik für Innere Medizin II, Hämatologie und Internistische Onkologie, Universitätsklinikum Jena, Am Klinikum 1, 07747 Jena, Germany, [fanny.wiese@med.uni-jena.de](mailto:fanny.wiese@med.uni-jena.de)

| Reference                                                | Study type                 | Patient characteristics                   | Intervention/<br>Control,<br>observation   | Examined endpoints                        | Key findings                                | Adverse Events/Interactions                                                                                                                                                                                                                                                                                                                                                                                                                                   | Founding/<br>Conflicts of interest | Methodological comments          | Evidence class (Oxford)    |    |
|----------------------------------------------------------|----------------------------|-------------------------------------------|--------------------------------------------|-------------------------------------------|---------------------------------------------|---------------------------------------------------------------------------------------------------------------------------------------------------------------------------------------------------------------------------------------------------------------------------------------------------------------------------------------------------------------------------------------------------------------------------------------------------------------|------------------------------------|----------------------------------|----------------------------|----|
| <b>Emami (2014):<br/>Double-blinded,<br/>randomized,</b> | prospective<br>monocentric | standardized<br>radiation with<br>5000cGy | <b>Arm A:</b><br>N=21,<br>green tea tablet | <b>Primary endpoints:</b><br>1. frequency | 1. week 2: no<br>difference in<br>frequency | dyspnea: 1 (10)<br>cough: 1 (10)<br>transaminitis: 0 (0)<br>hyperbilirubinemia: 1<br>(10)<br>high alkaline<br>phosphatase: 0 (0)<br>high lipase: 0 (0)<br>hyperuricemia: 1 (10)<br>proteinuria: 1 (10)<br>anemia: 0<br>headache: 2 (20)<br>confusion: 1 (10)<br>insomnia: 0 (0)<br>irregular menses: 1<br>(10)<br>hot flashes: 0 (0)<br>flushing: 1 (10)<br>vaginal symptoms: 1<br>(10)<br><br>overall, mainly grade I<br>AE in the<br>gastrointestinal tract | according to statement<br>no AE    | according to<br>statement no CoI | <b>PRO:</b><br>ethics vote | 2b |

Title: Green tea and green tea extract in oncological treatment: a systematic review

Journal: International Journal for Vitamin and Nutrition Research

Authors: Fanny Wiese, Sabine Kutschan, Jennifer Doerfler, Viktoria Mathies, Jens Buentzel, Judith Buentzel, Jutta Huebner

Corresponding author: Fanny Wiese, Klinik für Innere Medizin II, Hämatologie und Internistische Onkologie, Universitätsklinikum Jena, Am Klinikum 1, 07747 Jena, Germany, [fanny.wiese@med.uni-jena.de](mailto:fanny.wiese@med.uni-jena.de)

| Reference                                                                                                                                                                                                                                                   | Study type                                                                                                                                                        | Patient characteristics                                                                                                                                                                                                                                                                                             | Intervention/<br>Control,<br>observation                                                                          | Examined endpoints                                                                                                                                                                                                                                                                                                                            | Key findings                                                                                                                                                                                                                                                                                          | Adverse Events/Interactions | Founding/<br>Conflicts of interest | Methodological comments                                                                                                                                                                                                                                                                                                                                | Evidence class (Oxford) |
|-------------------------------------------------------------------------------------------------------------------------------------------------------------------------------------------------------------------------------------------------------------|-------------------------------------------------------------------------------------------------------------------------------------------------------------------|---------------------------------------------------------------------------------------------------------------------------------------------------------------------------------------------------------------------------------------------------------------------------------------------------------------------|-------------------------------------------------------------------------------------------------------------------|-----------------------------------------------------------------------------------------------------------------------------------------------------------------------------------------------------------------------------------------------------------------------------------------------------------------------------------------------|-------------------------------------------------------------------------------------------------------------------------------------------------------------------------------------------------------------------------------------------------------------------------------------------------------|-----------------------------|------------------------------------|--------------------------------------------------------------------------------------------------------------------------------------------------------------------------------------------------------------------------------------------------------------------------------------------------------------------------------------------------------|-------------------------|
| <b>placebo-controlled study to evaluate the effectiveness of green tea in preventing acute gastrointestinal complications due to radiotherapy. Journal of research in medical sciences: the official journal of Isfahan University of Medical Sciences.</b> | double-blinded randomized<br>2 arms<br>number of participants included: N=42<br>(number of participants evaluated: N=42)<br>Iran, February 2013 to September 2013 | (1000cGy weekly) for patients with pelvic and abdominal malignancy (prostate, uterus, cervix, bladder, rectum and colon); cancer type and stage: no information<br><br>RTx, CTx, postoperative<br><br>gender: 45% female<br><br>age:<br>arm A: mean=65.7, SD=9.3;<br>arm B: mean=58.7, SD=13.6;<br>common mean=62.2 | oral, 450mg, 1 x daily for 5 weeks during irradiation<br><br><b>Arm B:</b> N=21, placebo tablet, intake see above | and severity of diarrhea (frequency with diary, classification of severity by CTCAE)<br><br>2. frequency and severity of vomiting (frequency with diary, classification of severity by FLIE)<br><br>daily recording by diary (number, consistency of feces, occurrence of symptoms such as nausea, vomiting and gastrointestinal cramps) from | without diarrhea, arm A: N=16, arm B: N=18 (p=0.4); week 3-5: significantly lower frequency of diarrhea in arm A compared to arm B, week 3: without diarrhea, arm A: N=14, arm B: N=9 (p=0.04) week 4: without diarrhea, arm A: N=16, arm B: N=7 (p=0.002) week 5: without diarrhea, arm A: N=17, arm |                             |                                    | comparability of groups is given<br><br>power analysis performed and criteria met<br><br><b>CONTRA:</b> small sample size<br><br>no test for normal distribution<br><br>no detailed information on randomization process<br><br>missing demographic data (initial diagnosis, drug use, comorbidities, previous experience with etc.)<br><br>very short |                         |

Title: Green tea and green tea extract in oncological treatment: a systematic review

Journal: International Journal for Vitamin and Nutrition Research

Authors: Fanny Wiese, Sabine Kutschan, Jennifer Doerfler, Viktoria Mathies, Jens Buentzel, Judith Buentzel, Jutta Huebner

Corresponding author: Fanny Wiese, Klinik für Innere Medizin II, Hämatologie und Internistische Onkologie, Universitätsklinikum Jena, Am Klinikum 1, 07747 Jena, Germany, [fanny.wiese@med.uni-jena.de](mailto:fanny.wiese@med.uni-jena.de)

| Reference                                                                                                                                                                            | Study type                                                                    | Patient characteristics                                                                                                                                                        | Intervention/<br>Control,<br>observation                                                                                                                                                                                                  | Examined<br>endpoints                                                                                                                                                                                                                              | Key findings                                                                                                                                                                | Adverse<br>Events/Interactions                                                                                                      | Founding/<br>Conflicts of<br>interest                               | Methodological<br>comments                                                                                                                                                                                                                                                                                                                                                                                                                         | Evidence<br>class<br>(Oxford) |
|--------------------------------------------------------------------------------------------------------------------------------------------------------------------------------------|-------------------------------------------------------------------------------|--------------------------------------------------------------------------------------------------------------------------------------------------------------------------------|-------------------------------------------------------------------------------------------------------------------------------------------------------------------------------------------------------------------------------------------|----------------------------------------------------------------------------------------------------------------------------------------------------------------------------------------------------------------------------------------------------|-----------------------------------------------------------------------------------------------------------------------------------------------------------------------------|-------------------------------------------------------------------------------------------------------------------------------------|---------------------------------------------------------------------|----------------------------------------------------------------------------------------------------------------------------------------------------------------------------------------------------------------------------------------------------------------------------------------------------------------------------------------------------------------------------------------------------------------------------------------------------|-------------------------------|
| <b>Henning (2015):<br/>Randomized<br/>Clinical Trial of<br/>Brewed Green<br/>and Black Tea<br/>in Men With<br/>Prostate Cancer<br/>Prior to<br/>Prostatectomy.<br/>The Prostate.</b> | prospective<br>multicentric<br>open label<br>randomized<br>3 arms<br>phase II | prostate<br>adenocarcinoma<br>preoperative<br>(radical<br>prostatectomy)<br>gender: 100%<br>male<br>age:<br>arm A:<br>mean=62.1,<br>SD=6.9;<br>arm B:<br>mean=61.4,<br>SD=7.4; | <b>Arm A:</b><br>N=34,<br>6 cups of green<br>tea per day,<br>including<br>562mg EGCG,<br>until surgery<br>(mean<br>duration=33<br>days)<br><br><b>Arm B:</b><br>N=26,<br>6 cups of black<br>tea per day,<br>including 28mg<br>EGCG, until | T0: baseline,<br>T1: post-<br>intervention<br><br><b>Secondary<br/>endpoints:</b><br>1. serum PSA<br>levels<br>Furthermore,<br>prostate tumor<br>markers were<br>collected as the<br>primary<br>endpoint and<br>urine oxidation,<br>tea polyphenol | the 1st day of<br>the 2nd week<br>until the end of<br>the 5th week<br><br>B: N=8<br>(p=0.002)<br><br>2. no significant<br>difference<br>between both<br>arms and/or<br>time | according to statement<br>there were no serious<br>AE related<br>to the interventions, no<br>information regarding<br>the recording | grand sponsor: NIH<br>according to<br>statement no<br>potential CoI | reporting with few<br>details and<br>inconsistencies,<br>statistical results<br>not<br>comprehensible<br>and interpretation<br>of results by<br>authors incorrect<br>and misleading<br><br><b>PRO:</b><br>ethics vote<br><br>multicentric study<br><br>comparability of<br>groups is given<br><br>wash out and<br>control of<br>confounders:<br>subjects<br>were instructed to<br>abstain from all<br>teas and tea<br>containing<br>products other | 2b                            |

Title: Green tea and green tea extract in oncological treatment: a systematic review

Journal: International Journal for Vitamin and Nutrition Research

Authors: Fanny Wiese, Sabine Kutschan, Jennifer Doerfler, Viktoria Mathies, Jens Buentzel, Judith Buentzel, Jutta Huebner

Corresponding author: Fanny Wiese, Klinik für Innere Medizin II, Hämatologie und Internistische Onkologie, Universitätsklinikum Jena, Am Klinikum 1, 07747 Jena, Germany, [fanny.wiese@med.uni-jena.de](mailto:fanny.wiese@med.uni-jena.de)

| Reference | Study type                                                                                                                              | Patient characteristics                                 | Intervention/ Control, observation                                                                                        | Examined endpoints                                                              | Key findings                                                                                                   | Adverse Events/Interactions | Founding/ Conflicts of interest | Methodological comments                                                                                                                                                                                                                                                                                                                             | Evidence class (Oxford) |
|-----------|-----------------------------------------------------------------------------------------------------------------------------------------|---------------------------------------------------------|---------------------------------------------------------------------------------------------------------------------------|---------------------------------------------------------------------------------|----------------------------------------------------------------------------------------------------------------|-----------------------------|---------------------------------|-----------------------------------------------------------------------------------------------------------------------------------------------------------------------------------------------------------------------------------------------------------------------------------------------------------------------------------------------------|-------------------------|
|           | participants completed the intervention: N=93; attrition: N=9 in arm A, N=7 in arm B, N=4 in arm C)<br><br>USA (Los Angeles), 2008-2012 | arm C: mean=62.8, SD=6.2; common mean=62.2; range=40-70 | surgery (mean duration=31 days)<br><br><b>Arm C:</b> N=33, 6 cups of water per day, until surgery (mean duration=29 days) | uptake in prostate tissue and urine as another secondary endpoint of the study. | changes between arm B and arm C, p>0.05: PSA arm B (N=23): T0:9.2±4.3 to T1:9.6±6.0 vs. arm C (N=30) see above |                             |                                 | than the study tea and stop nutritional supplements and herbal therapies (i.e. lycopene, selenium, vitamin E, fish oil, and saw palmetto)<br><br>control of adherence (diary entries: arm A=95%, arm B=92%, arm C=93%)<br><br>polyphenol composition of brewed tea determined by HPLC<br><br>power analysis<br><br>testing for normal distribution, |                         |

Title: Green tea and green tea extract in oncological treatment: a systematic review

Journal: International Journal for Vitamin and Nutrition Research

Authors: Fanny Wiese, Sabine Kutschan, Jennifer Doerfler, Viktoria Mathies, Jens Buentzel, Judith Buentzel, Jutta Huebner

Corresponding author: Fanny Wiese, Klinik für Innere Medizin II, Hämatologie und Internistische Onkologie, Universitätsklinikum Jena, Am Klinikum 1, 07747 Jena, Germany, [fanny.wiese@med.uni-jena.de](mailto:fanny.wiese@med.uni-jena.de)

---

| Reference | Study type | Patient characteristics | Intervention/<br>Control,<br>observation | Examined endpoints | Key findings | Adverse Events/Interactions | Founding/<br>Conflicts of interest | Methodological comments                                                                                                          | Evidence class (Oxford) |
|-----------|------------|-------------------------|------------------------------------------|--------------------|--------------|-----------------------------|------------------------------------|----------------------------------------------------------------------------------------------------------------------------------|-------------------------|
|           |            |                         |                                          |                    |              |                             |                                    | consideration of the possibility of $\alpha$ cumulation through multiple testing and adequate application of statistical methods |                         |
|           |            |                         |                                          |                    |              |                             |                                    | <b>CONTRA:</b><br>not blinded                                                                                                    |                         |
|           |            |                         |                                          |                    |              |                             |                                    | evaluation per-protocol                                                                                                          |                         |
|           |            |                         |                                          |                    |              |                             |                                    | inconsistencies regarding group size for PSA levels (apparently not all evaluated, no information on missing data)               |                         |
|           |            |                         |                                          |                    |              |                             |                                    | high attrition                                                                                                                   |                         |
|           |            |                         |                                          |                    |              |                             |                                    | multiple endpoints, the overall false                                                                                            |                         |

Title: Green tea and green tea extract in oncological treatment: a systematic review

Journal: International Journal for Vitamin and Nutrition Research

Authors: Fanny Wiese, Sabine Kutschan, Jennifer Doerfler, Viktoria Mathies, Jens Buentzel, Judith Buentzel, Jutta Huebner

Corresponding author: Fanny Wiese, Klinik für Innere Medizin II, Hämatologie und Internistische Onkologie, Universitätsklinikum Jena, Am Klinikum 1, 07747 Jena, Germany, [fanny.wiese@med.uni-jena.de](mailto:fanny.wiese@med.uni-jena.de)

| Reference                                                                                                                                       | Study type                                                                                                                                                | Patient characteristics                                                                           | Intervention/<br>Control,<br>observation                                                                                                                                                                                        | Examined endpoints                                                                                                                                                                                                                                                                                     | Key findings                                                                                                                                                         | Adverse Events/Interactions                                                                                                                                                                                                                                                                                                                                         | Founding/<br>Conflicts of interest                                                                                                                                                                                                                         | Methodological comments                                                                                                                                                                                                                                                                                                                                                                                                    | Evidence class (Oxford) |
|-------------------------------------------------------------------------------------------------------------------------------------------------|-----------------------------------------------------------------------------------------------------------------------------------------------------------|---------------------------------------------------------------------------------------------------|---------------------------------------------------------------------------------------------------------------------------------------------------------------------------------------------------------------------------------|--------------------------------------------------------------------------------------------------------------------------------------------------------------------------------------------------------------------------------------------------------------------------------------------------------|----------------------------------------------------------------------------------------------------------------------------------------------------------------------|---------------------------------------------------------------------------------------------------------------------------------------------------------------------------------------------------------------------------------------------------------------------------------------------------------------------------------------------------------------------|------------------------------------------------------------------------------------------------------------------------------------------------------------------------------------------------------------------------------------------------------------|----------------------------------------------------------------------------------------------------------------------------------------------------------------------------------------------------------------------------------------------------------------------------------------------------------------------------------------------------------------------------------------------------------------------------|-------------------------|
| <b>Kessels (2017): Topical sincatechins, 10%, ointment for superficial basal cell carcinoma: a randomized clinical trial. JAMA dermatology.</b> | monocentric<br>double-blinded<br>randomized<br>2 arms<br>number of participants included: N=42 (drop-out: N= 3)<br><br>Netherlands,<br>Jan 2014- May 2016 | superficial basal cell carcinoma<br>preoperative<br>gender: no information<br>age: no information | <b>Arm A:</b><br>N=21,<br>topical sincatechin ointment, 10% with 55-72mg EGCG per 1g ointment (applied twice a day for 6 weeks by patients themselves)<br><br><b>Arm B:</b><br>N=21,<br>placebo ointment, application see above | T0: baseline, T1: after 3 weeks, T2: after 6 weeks, T3: after 8 weeks (directly before surgery)<br><br><b>Primary endpoints:</b><br>1. percentage of patients with no tumors by histological examination (T3)<br><br>2. size of the tumor (T1, T2, T3)<br><br>Preclinical outcomes were also assessed. | 1. no significant difference between the arms (arm A: 1 case (5%), arm B: 2 cases (10%), p>0.99)<br><br>To 2.<br>No significant difference between the arms (p=0.15) | data acquisition by doctor and weekly diary entries of the patients:<br><br>in arm A significantly higher frequency of moderate to serious erythema (To T1/T2/T3 in %:<br>arm A: 10/12/9, arm B: 6/2/2), edema (arm A: 2/6/3, arm B: 0/0/0), erosion (arm A: 5/7/4, arm B: 1/0/0), crusts (arm A: 3/10/6, arm B: 2/0/0) and itching (arm A: 10/13/12, arm B: 3/0/1) | according to statement no CoI<br><br>This study was supported in part by Willpharma BV, which supplied study medication (sincatechins ointment, 10%, and placebo ointment).<br>The sponsor was not involved in the design and implementation of the study. | detection rate was 10.8%.<br><br><b>PRO:</b><br>ethics vote<br><br>power analysis performed and criteria met<br><br>1-week wash-out of green tea before the start of the study<br><br>control of co-interventions (no further consumption of green tea, immunosuppressive medication)<br><br>control of adherence<br><br><b>CONTRA:</b><br>no information about demographic data and comparability of the arms at baseline | 2b                      |



Title: Green tea and green tea extract in oncological treatment: a systematic review

Journal: International Journal for Vitamin and Nutrition Research

Authors: Fanny Wiese, Sabine Kutschan, Jennifer Doerfler, Viktoria Mathies, Jens Buentzel, Judith Buentzel, Jutta Huebner

Corresponding author: Fanny Wiese, Klinik für Innere Medizin II, Hämatologie und Internistische Onkologie, Universitätsklinikum Jena, Am Klinikum 1, 07747 Jena, Germany, [fanny.wiese@med.uni-jena.de](mailto:fanny.wiese@med.uni-jena.de)

| Reference                                                                                                                                                                                                                         | Study type                                                                                                                                                                                                        | Patient characteristics                                                                                                    | Intervention/<br>Control,<br>observation                                                                                                                                                                                                                                                                                                                      | Examined endpoints                                                                                                                                                                                                                                                                           | Key findings                                                                                                                                                                                                                                                                                                                   | Adverse Events/Interactions                                                     | Founding/<br>Conflicts of interest                                | Methodological comments                                                                                                                                                                                                                                                                                                                                                                       | Evidence class (Oxford) |
|-----------------------------------------------------------------------------------------------------------------------------------------------------------------------------------------------------------------------------------|-------------------------------------------------------------------------------------------------------------------------------------------------------------------------------------------------------------------|----------------------------------------------------------------------------------------------------------------------------|---------------------------------------------------------------------------------------------------------------------------------------------------------------------------------------------------------------------------------------------------------------------------------------------------------------------------------------------------------------|----------------------------------------------------------------------------------------------------------------------------------------------------------------------------------------------------------------------------------------------------------------------------------------------|--------------------------------------------------------------------------------------------------------------------------------------------------------------------------------------------------------------------------------------------------------------------------------------------------------------------------------|---------------------------------------------------------------------------------|-------------------------------------------------------------------|-----------------------------------------------------------------------------------------------------------------------------------------------------------------------------------------------------------------------------------------------------------------------------------------------------------------------------------------------------------------------------------------------|-------------------------|
| <b>Lian (2014): Comparing the effectiveness of green tea versus topical metronidazole powder in malodorous control of fungating malignant wounds in a controlled randomised study. Proceedings of singapore healthcare. RefID</b> | prospective monocentric blinding: no information (probably not blinded) (block-) randomized 2 arms number of participants included: N=30 (number of participants completed the intervention: N=29; attrition: N=1 | malodorous fungating malignant wounds gender: 90% female age: arm A: median=55, range=33-81; arm B: median=46, range=35-81 | <b>Arm A:</b> N=15, green tea, daily dressing for 7 days, irrigate wound with green tea solution (1 tea bag to 250ml boiling water for 10 minutes), cover wound with absorbent pad with dry green tea bag (1 to 50cm <sup>2</sup> -1 green tea bag, 51 to 100cm <sup>2</sup> -2 green tea bags) and secure with tape<br><br><b>Arm B:</b> N=15, metronidazole | <b>Primary endpoints:</b> 1. malodorous of wounds: measurement tool was VNS (0="no smell" and 10="the worst smell that one can imagine"), using by patient and nurse independently daily 2. QoL: measurement with a five-item questionnaire which was rated on a VNS (0 being the healthiest | 1. reduction in malodorous score in all patients showed within seven days of treatment, no significant difference in the improvement of odor between both arms in self- and nurses' assessment, (p>0.05)<br><br>2. improvement in odor control in all patients showed after day 7 (p=0.00), impairment of daily life (p=0.00), | no AE reported, no information on the recording of AE (probably only reporting) | study was funded by Ministry of Health Nursing Research Committee | unclear whether intention-to-treat analysis<br><br><b>PRO:</b> ethics vote<br><br>power analysis performed and criteria met<br><br>block-randomization by sealed opaque envelopes (by a research assistant)<br><br>wash out: patients receiving systemic metronidazole or patients treated with topical metronidazole for more than 30 days were excluded<br><br>control of confounders (like | 2b                      |

Title: Green tea and green tea extract in oncological treatment: a systematic review

Journal: International Journal for Vitamin and Nutrition Research

Authors: Fanny Wiese, Sabine Kutschan, Jennifer Doerfler, Viktoria Mathies, Jens Buentzel, Judith Buentzel, Jutta Huebner

Corresponding author: Fanny Wiese, Klinik für Innere Medizin II, Hämatologie und Internistische Onkologie, Universitätsklinikum Jena, Am Klinikum 1, 07747 Jena, Germany, [fanny.wiese@med.uni-jena.de](mailto:fanny.wiese@med.uni-jena.de)

| Reference | Study type                                                                       | Patient characteristics | Intervention/ Control, observation                                                                                                                                                                                                                                      | Examined endpoints                                                                                                                                                               | Key findings                                                                                                                                                                                                                                                                                                                                                                                                                         | Adverse Events/Interactions | Founding/ Conflicts of interest | Methodological comments                                                                                                                                                                                                                                                                                                                                                                                                                                           | Evidence class (Oxford) |
|-----------|----------------------------------------------------------------------------------|-------------------------|-------------------------------------------------------------------------------------------------------------------------------------------------------------------------------------------------------------------------------------------------------------------------|----------------------------------------------------------------------------------------------------------------------------------------------------------------------------------|--------------------------------------------------------------------------------------------------------------------------------------------------------------------------------------------------------------------------------------------------------------------------------------------------------------------------------------------------------------------------------------------------------------------------------------|-----------------------------|---------------------------------|-------------------------------------------------------------------------------------------------------------------------------------------------------------------------------------------------------------------------------------------------------------------------------------------------------------------------------------------------------------------------------------------------------------------------------------------------------------------|-------------------------|
|           | in arm A, patient died on day 5)<br><br>Singapore, November 2005 to October 2008 |                         | powder, daily dressing for 7 days, irrigate wound with normal saline 0.9%, sprinkle metronidazole powder to wound bed (1 to 50cm <sup>2</sup> -400mg metronidazole, 51 to 100cm <sup>2</sup> -800mg metronidazole), cover wound with absorbent pad and secure with tape | attribute and 10 being the worst), performed on day 1 and day 7<br><br>3. healing progress: measurement by taking a picture using a digital camera, performed on day 1 and day 7 | physical complaints (p=0.00), appetite (p=0.00) and social activities (p=0.00); no significant differences between the two arms (p>0.05), except for Q5 (interference of odor with social activities) in favor of arm A on day 1 (p=0.04)<br><br>3. no statistical significance between both arms (p>0.05)<br><br>note: eight patients in arm A reported having 'cooling' effect on the wound bed after cleansing with the green tea |                             |                                 | wound size, necrotic tissue and necrotic amount): characteristics of wounds in both groups were comparable (except patients in arm A have significantly larger wound sizes)<br><br>to maintain internal consistency of data collection, all data collectors attended structured training sessions conducted by the principal investigator<br><br>intention-to-treat analysis<br><br><b>CONTRA:</b> small sample size<br><br>probably not blinded (no information) |                         |

Title: Green tea and green tea extract in oncological treatment: a systematic review

Journal: International Journal for Vitamin and Nutrition Research

Authors: Fanny Wiese, Sabine Kutschan, Jennifer Doerfler, Viktoria Mathies, Jens Buentzel, Judith Buentzel, Jutta Huebner

Corresponding author: Fanny Wiese, Klinik für Innere Medizin II, Hämatologie und Internistische Onkologie, Universitätsklinikum Jena, Am Klinikum 1, 07747 Jena, Germany, [fanny.wiese@med.uni-jena.de](mailto:fanny.wiese@med.uni-jena.de)

| Reference                                                                                                                                                                          | Study type                                                                                        | Patient characteristics                                                                                                 | Intervention/Control, observation                                                                                                | Examined endpoints                                                                                                                                | Key findings                                                                                                                                                            | Adverse Events/Interactions                                                                                                                                                                                   | Founding/Conflicts of interest                                                                                                                                                   | Methodological comments                                                                                                                                 | Evidence class (Oxford) |
|------------------------------------------------------------------------------------------------------------------------------------------------------------------------------------|---------------------------------------------------------------------------------------------------|-------------------------------------------------------------------------------------------------------------------------|----------------------------------------------------------------------------------------------------------------------------------|---------------------------------------------------------------------------------------------------------------------------------------------------|-------------------------------------------------------------------------------------------------------------------------------------------------------------------------|---------------------------------------------------------------------------------------------------------------------------------------------------------------------------------------------------------------|----------------------------------------------------------------------------------------------------------------------------------------------------------------------------------|---------------------------------------------------------------------------------------------------------------------------------------------------------|-------------------------|
|                                                                                                                                                                                    |                                                                                                   |                                                                                                                         |                                                                                                                                  |                                                                                                                                                   | fluid                                                                                                                                                                   |                                                                                                                                                                                                               |                                                                                                                                                                                  | group comparability not sufficiently given, difference at baseline: larger wounds in arm A compared to arm B (p<0.04)                                   |                         |
|                                                                                                                                                                                    |                                                                                                   |                                                                                                                         |                                                                                                                                  |                                                                                                                                                   |                                                                                                                                                                         |                                                                                                                                                                                                               |                                                                                                                                                                                  | tool for assessing QoL not validated and may lead patients to more positive answers                                                                     |                         |
| <b>Nguyen (2012): Randomized, double-blind, placebo-controlled trial of polyphenon E in prostate cancer patients before prostatectomy: evaluation of potential chemopreventive</b> | prospective<br>mono- or multicentric:<br>no information<br>double-blinded<br>randomized<br>2 arms | prostate cancer<br>preoperative (radical prostatectomy)<br>gender: 100% male<br>age:<br>arm A:<br>mean=63.4,<br>SD=5.9; | <b>Arm A:</b><br>N=25,<br>polyphenon E (containing 800mg EGCG), 4 capsules (each 200mg EGCG) with food<br><b>Arm B:</b><br>N=25, | T0: baseline,<br>T1: post-intervention<br><b>Secondary endpoints:</b><br>1. serum PSA<br>Furthermore, bioavailability of green tea polyphenols in | 1. PSA values showed a greater reduction in arm A than in arm B, but these were not statistically significant (arm A: -0.66±2.56ng/ml, arm B: -0.08±1.28ng/ml, p=0.26); | description and grading by NCI CTCAE version 3.0, frequency by diary entries<br>AE were all grade I or II events<br>a total of 18 (arm A) and 39 (arm B) AE occurred, summary of AE occurring in greater than | according to statement no potential CoI<br>This work was supported by a contract from the National Cancer Institute and the Arizona Cancer Center Support Grant.<br>The costs of | <b>PRO:</b><br>ethics vote<br>group comparability is given<br>wash out: patients were excluded if they drank tea regularly within 1 month of enrollment | 2b                      |

Title: Green tea and green tea extract in oncological treatment: a systematic review

Journal: International Journal for Vitamin and Nutrition Research

Authors: Fanny Wiese, Sabine Kutschan, Jennifer Doerfler, Viktoria Mathies, Jens Buentzel, Judith Buentzel, Jutta Huebner

Corresponding author: Fanny Wiese, Klinik für Innere Medizin II, Hämatologie und Internistische Onkologie, Universitätsklinikum Jena, Am Klinikum 1, 07747 Jena, Germany, [fanny.wiese@med.uni-jena.de](mailto:fanny.wiese@med.uni-jena.de)

| Reference                                                                                                   | Study type                                                                                                                                                                                                              | Patient characteristics                            | Intervention/Control, observation                                                 | Examined endpoints                                                                                                                                                      | Key findings                                                                                            | Adverse Events/Interactions                                                                                                                                                                                                                                                                                                                                                                                        | Founding/Conflicts of interest                                                           | Methodological comments                                                                                                                                                                                                                                                                                                                                                                                          | Evidence class (Oxford) |
|-------------------------------------------------------------------------------------------------------------|-------------------------------------------------------------------------------------------------------------------------------------------------------------------------------------------------------------------------|----------------------------------------------------|-----------------------------------------------------------------------------------|-------------------------------------------------------------------------------------------------------------------------------------------------------------------------|---------------------------------------------------------------------------------------------------------|--------------------------------------------------------------------------------------------------------------------------------------------------------------------------------------------------------------------------------------------------------------------------------------------------------------------------------------------------------------------------------------------------------------------|------------------------------------------------------------------------------------------|------------------------------------------------------------------------------------------------------------------------------------------------------------------------------------------------------------------------------------------------------------------------------------------------------------------------------------------------------------------------------------------------------------------|-------------------------|
| <p><b>activities.</b></p> <p><b>Cancer prevention research (Philadelphia, Pa.).</b></p> <p><b>RefID</b></p> | <p>number of participants included: N=50 (number of participants completed the intervention: N=48; attrition: N=1 in each arm, surgery cancelled, drop-out: 2-23% missing data)</p> <p>USA, March 2007 to July 2010</p> | <p>arm B: mean=61.3, SD=5.7; common mean=62.35</p> | <p>placebo, intake see above</p> <p>duration: for 3 to 6 weeks before surgery</p> | <p>prostate tissue after intervention (as actually the primary endpoint of the study), plasma concentration and other systemic and tissue biomarkers were assessed.</p> | <p>N (%), PSA reduction arm A: 14 (58.3), arm B: 8 (36.4), no significant group difference (p=0.15)</p> | <p>4% of subjects in arm A and arm B, regardless of attribution (number of AE (number of patients affected in %)):</p> <p><b>Arm A:</b><br/>nausea: 4 (16)<br/>diarrhea: 2 (8)<br/>headache: 1 (4)<br/>fever: 0 (0)<br/>body ache: 0 (0)<br/>muscle ache: 0 (0)</p> <p><b>Arm B:</b><br/>nausea: 4 (16)<br/>diarrhea: 5 (20)<br/>headache: 2 (8)<br/>fever: 3 (12)<br/>body ache: 2 (8)<br/>muscle ache: 2 (8)</p> | <p>publication of this article were defrayed in part by the payment of page charges.</p> | <p>control of therapy adherence (capsule count and intake calendar)</p> <p>testing the normal distribution of data and applying adequate tests</p> <p><b>CONTRA:</b><br/>small sample size (post-hoc power analysis performed and criteria not met)</p> <p>intention-to-treat analysis of AE (possible underestimation of AE)</p> <p>per-protocol analysis of endpoints</p> <p>unclear randomization process</p> |                         |

Title: Green tea and green tea extract in oncological treatment: a systematic review

Journal: International Journal for Vitamin and Nutrition Research

Authors: Fanny Wiese, Sabine Kutschan, Jennifer Doerfler, Viktoria Mathies, Jens Buentzel, Judith Buentzel, Jutta Huebner

Corresponding author: Fanny Wiese, Klinik für Innere Medizin II, Hämatologie und Internistische Onkologie, Universitätsklinikum Jena, Am Klinikum 1, 07747 Jena, Germany, [fanny.wiese@med.uni-jena.de](mailto:fanny.wiese@med.uni-jena.de)

| Reference                                                                                                                                                    | Study type                 | Patient characteristics                                                                                                                                                                   | Intervention/<br>Control,<br>observation                                                                                                                                              | Examined endpoints                                                                                                                                                        | Key findings                                                                                                                                                                                                    | Adverse Events/Interactions                                                                                                     | Founding/<br>Conflicts of interest                                                                                                                                                                        | Methodological comments                                                                                                                                                                                                   | Evidence class (Oxford) |
|--------------------------------------------------------------------------------------------------------------------------------------------------------------|----------------------------|-------------------------------------------------------------------------------------------------------------------------------------------------------------------------------------------|---------------------------------------------------------------------------------------------------------------------------------------------------------------------------------------|---------------------------------------------------------------------------------------------------------------------------------------------------------------------------|-----------------------------------------------------------------------------------------------------------------------------------------------------------------------------------------------------------------|---------------------------------------------------------------------------------------------------------------------------------|-----------------------------------------------------------------------------------------------------------------------------------------------------------------------------------------------------------|---------------------------------------------------------------------------------------------------------------------------------------------------------------------------------------------------------------------------|-------------------------|
| <b>Stendell-Hollis (2010): Green tea improves metabolic biomarkers, not weight or body composition: a pilot study in overweight breast cancer survivors.</b> | pilot-study<br>prospective | breast cancer survivors                                                                                                                                                                   | <b>Arm A:</b><br>N=29,<br>green tea,<br>decaffeinated,<br>960ml daily (=4<br>bags, containing<br>128.84mg<br>EGCG);<br>1 tea bag added<br>with 240ml water<br>and steep for 3<br>min. | T0: baseline, T1:<br>after 6 months<br><br><b>Primary endpoints:</b><br>1. body weight:<br>measurement by<br>using<br>standardized<br>protocols<br>2. body<br>composition | 1. arm A: mean<br>body weight was<br>reduced by 1.2kg<br>at T1,<br>arm B: mean<br>body weight was<br>slightly rise by<br>0.2kg at T1, these<br>differences were<br>not statistically<br>significant<br>(p=0.23) | no information on AE<br>abortion of 4 test<br>persons due to<br>intolerance or not ability<br>of tea (not clear which<br>group) | authors declare they<br>have no CoI to<br>report<br><br>The work was<br>supported by the<br>National Susan G.<br>Komen Foundation<br>(Breast Cancer<br>Organization) and the<br>Arizona Cancer<br>Center. | no correction for<br>multiple testing for<br>comparison between<br>groups for changes<br><br>no information<br>about location<br>(hospital vs. at home<br>vs. hospice) of<br>survey<br><br>no explanation for<br>blinding | 2b                      |
|                                                                                                                                                              |                            | overweight/obese<br>(BMI= 25-<br>40kg/m <sup>2</sup> )<br><br>completion of<br>initial treatment for<br>early invasive<br>breast cancer (I-III)<br>at least 12 months<br>prior to, and no |                                                                                                                                                                                       |                                                                                                                                                                           |                                                                                                                                                                                                                 |                                                                                                                                 |                                                                                                                                                                                                           | run-in period<br><br>control of adherence<br>(by using daily tea<br>logs and counting of<br>used and unused tea<br>bags, adherence<br>very high with ><br>94% in both groups)                                             |                         |

Title: Green tea and green tea extract in oncological treatment: a systematic review

Journal: International Journal for Vitamin and Nutrition Research

Authors: Fanny Wiese, Sabine Kutschan, Jennifer Doerfler, Viktoria Mathies, Jens Buentzel, Judith Buentzel, Jutta Huebner

Corresponding author: Fanny Wiese, Klinik für Innere Medizin II, Hämatologie und Internistische Onkologie, Universitätsklinikum Jena, Am Klinikum 1, 07747 Jena, Germany, [fanny.wiese@med.uni-jena.de](mailto:fanny.wiese@med.uni-jena.de)

| Reference                                                          | Study type                                                                                                                                                         | Patient characteristics                                                                                                                                                  | Intervention/Control, observation                                                                                         | Examined endpoints                                                                                                                                                                              | Key findings                                                                                                                                                                                                                                                           | Adverse Events/Interactions | Founding/Conflicts of interest | Methodological comments                                                                                                                                                                                                                                                                                   | Evidence class (Oxford) |
|--------------------------------------------------------------------|--------------------------------------------------------------------------------------------------------------------------------------------------------------------|--------------------------------------------------------------------------------------------------------------------------------------------------------------------------|---------------------------------------------------------------------------------------------------------------------------|-------------------------------------------------------------------------------------------------------------------------------------------------------------------------------------------------|------------------------------------------------------------------------------------------------------------------------------------------------------------------------------------------------------------------------------------------------------------------------|-----------------------------|--------------------------------|-----------------------------------------------------------------------------------------------------------------------------------------------------------------------------------------------------------------------------------------------------------------------------------------------------------|-------------------------|
| <b>official journal of the British Dietetic Association. RefID</b> | number of participants included: N=54 (number of participants completed the intervention: N=39; attrition: N=6 in arm A, N=9 in arm B) USA, period: no information | more than 10 years prior to, enrolment in the study<br>gender: 100% female<br>age:<br>arm A: mean=56.6, SD=8.1;<br>arm B: mean=57.8, SD=8.5;<br>common mean=57.1, SD=8.2 | <b>Arm B:</b><br>N=25,<br>placebo, citrus-based herbal tea, intake see above, does not include EGCG<br>duration: 6 months | (BMI, body fat): measurement by using dual energy X-ray absorptiometry (DXA) in accordance with standardized procedures<br>Furthermore, metabolic parameters and lipid profiles were collected. | 2. arm A: BMI was reduced by 0.5kg/m <sup>2</sup> at T1, body fat was reduced by 0.6% at T1,<br>arm B: BMI has remained the same, body fat was slightly rise by 0.4% at T1, these differences were not statistically significant (p=0.22 for BMI, p=0.21 for body fat) |                             |                                | testing taste comparability of tea varieties (even if only with N=6)<br><br>control of general food intake via AFFQ and inclusion in analysis<br><br>testing for normal distribution of the data (baseline)<br><br><b>CONTRA:</b><br>small sample size<br><br>high attrition<br><br>per-protocol analysis |                         |

*AE* Adverse Events, *AFFQ* Arizona Food Frequency Questionnaire, *ALT* Alanin-Aminotransferase, *BMI* Body-Mass-Index, *CoI* Conflicts of Interest, *CTCAE* Common Terminology Criteria for Adverse Events, *CTx* Chemotherapy, *FLIE* Functional Living Index Emesis, *HPLC* High Performance Liquid Chromatography, *NCI* National Cancer Institute, *NIH* National Institutes of Health, *PSA* Prostate-Specific Antigen, *QoL* Quality of Life, *RTx* Radiotherapy, *VNS* Verbal Numerical Scale
